# Supplementary material for: Stroke, multimorbidity and polypharmacy in a nationally representative sample of 1,424,378 patients in Scotland: implications for treatment burden
Source: Springer Nature journal article supplement (doi:10.1186/s12916-014-0151-0), 2014-10-01
Supplement: MOESM8 [file 9758450]

**Table 1. Stroke status and number of morbidities (N=1,424,378)**

|                                                   | <b>Stroke N (%)<br/>35690 (100)</b> | <b>No stroke (%)<br/>1388688 (100)</b> | <b>Unadjusted <u>Odds Ratio</u><br/>(95% CI)<sup>a</sup></b> | <b>Age, gender and<br/>deprivation adjusted <u>Odds<br/>Ratio</u> (95% CI)<sup>a</sup></b> |
|---------------------------------------------------|-------------------------------------|----------------------------------------|--------------------------------------------------------------|--------------------------------------------------------------------------------------------|
| <b>Total number of morbidities<sup>b</sup></b>    |                                     |                                        |                                                              |                                                                                            |
| <b>None</b>                                       | 2053 (5.8)                          | 721430 (52.0)                          | 1                                                            | 1                                                                                          |
| <b>One-three</b>                                  | 17750 (49.7)                        | 551295 (39.7)                          | 11.31 (10.81 to 11.85)                                       | 4.35 (4.15 to 4.56)                                                                        |
| <b>Four-six</b>                                   | 12300 (34.5)                        | 100500 (7.2)                           | 43.01 (41.03 to 45.09)                                       | 8.59 (8.17 to 9.04)                                                                        |
| <b>Seven or more</b>                              | 3587 (10.1)                         | 15463 (1.1)                            | 81.52 (77.04 to 86.26)                                       | 12.81 (12.05 to 13.61)                                                                     |
| <b>Number of physical morbidities<sup>b</sup></b> |                                     |                                        |                                                              |                                                                                            |
| <b>None</b>                                       | 2769 (7.8)                          | 800202 (57.6)                          | 1                                                            | 1                                                                                          |
| <b>One-three</b>                                  | 20716 (58.0)                        | 510846 (36.8)                          | 11.72 (11.26 to 12.20)                                       | 4.03 (3.86 to 4.20)                                                                        |
| <b>Four-six</b>                                   | 10414 (29.2)                        | 70709 (5.1)                            | 42.56 (40.79 to 44.41)                                       | 7.32 (6.99 to 7.67)                                                                        |
| <b>Seven or more</b>                              | 1791 (5.0)                          | 6931 (0.5)                             | 74.68 (70.05 to 79.61)                                       | 10.33 (9.64 to 11.05)                                                                      |
| <b>Number of mental morbidities</b>               |                                     |                                        |                                                              |                                                                                            |
| <b>None</b>                                       | 21961 (61.5)                        | 1163095 (83.8)                         | 1                                                            | 1                                                                                          |
| <b>One-three</b>                                  | 13533 (37.9)                        | 223739 (16.1)                          | 3.20 (3.13 to 3.27)                                          | 2.08 (2.04 to 2.13)                                                                        |
| <b>Four or more</b>                               | 196 (0.5)                           | 1854 (0.1)                             | 5.60 (4.83 to 6.49)                                          | 3.56 (3.03 to 4.20)                                                                        |
| <sup>a</sup> all p<0.001                          |                                     |                                        |                                                              |                                                                                            |
| <sup>b</sup> excluding stroke                     |                                     |                                        |                                                              |                                                                                            |

Figure 1- Odds Ratios (with 95% CI) for physical morbidities in relation to stroke status (adjusted for age, gender, deprivation).  
Stroke N = 35690. Stroke-free N= 1388688.

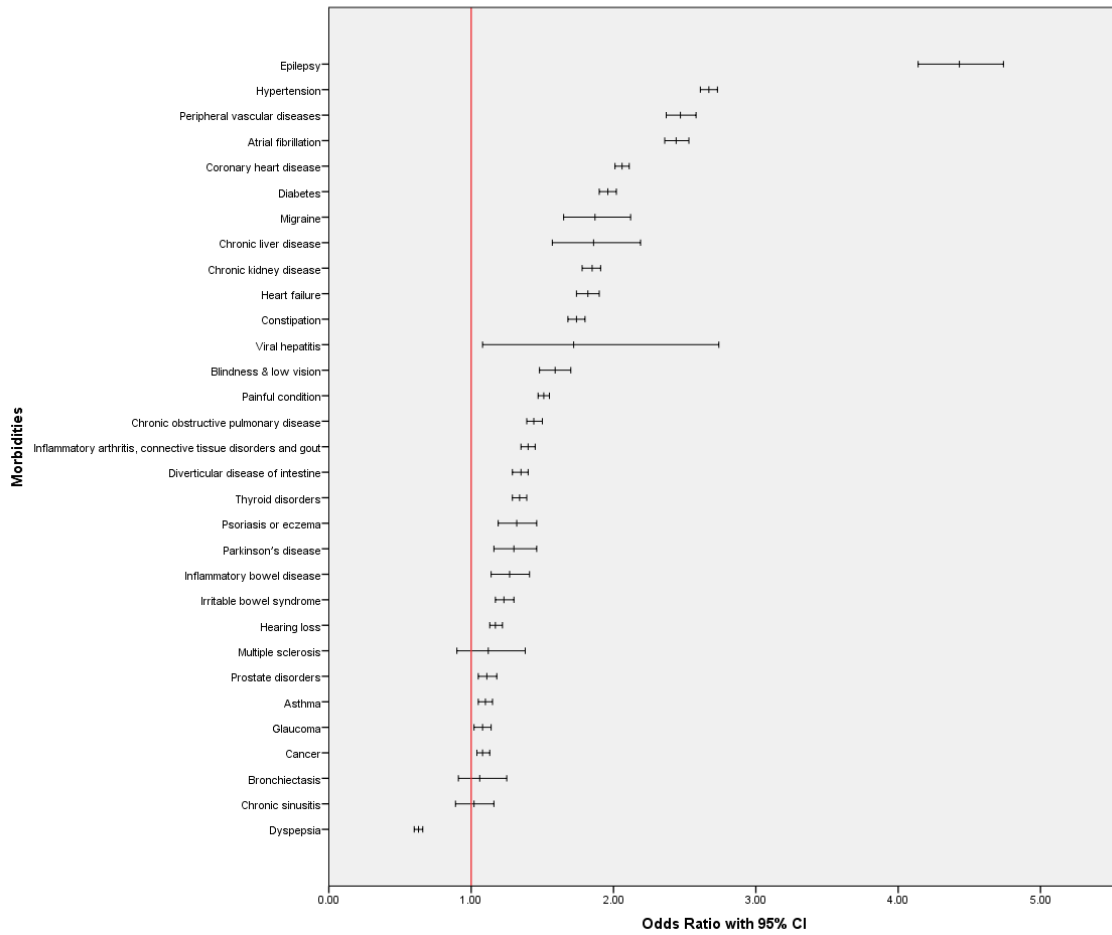

**Figure 2 - Odds Ratios (with 95% CI) for mental health morbidities in relation to stroke status (adjusted for age, gender, deprivation). Stroke N= 35690. Stroke-free N= 1388688.**

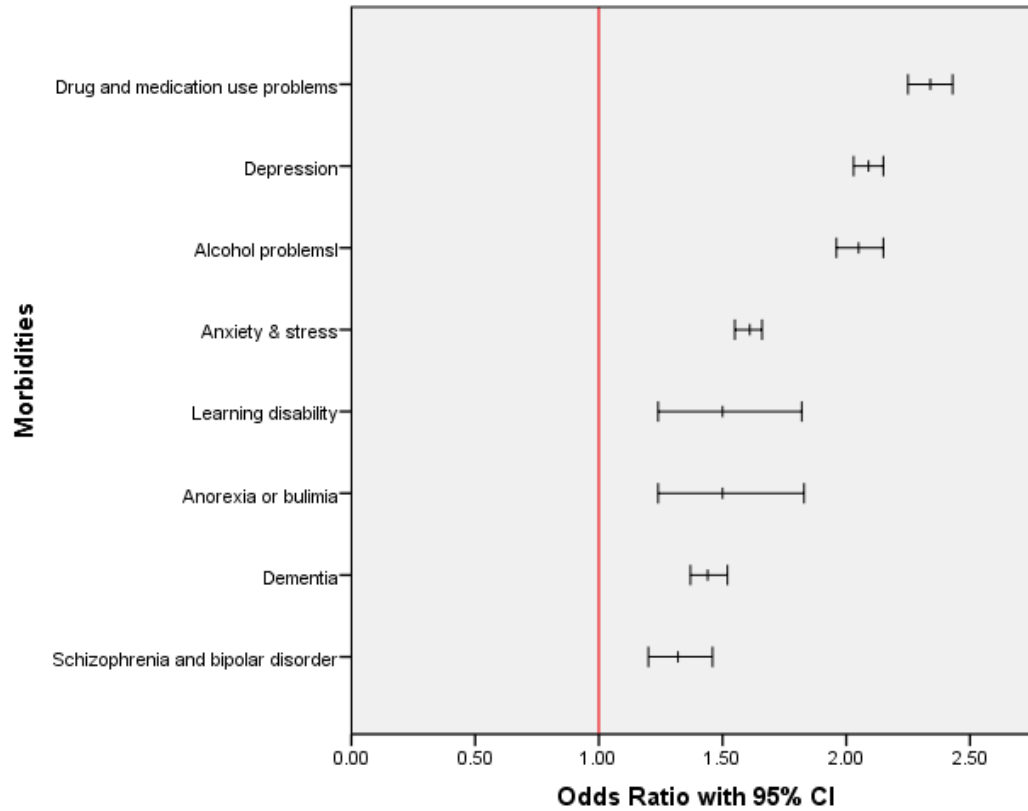

Note: Drug related problems is any Read code which records psychoactive substance abuse which includes both drug misuse and prescription drug problems of multiple sources.

**Formatted:** Font: 10 pt, Bold

**Table 2. Stroke status and number of repeat medications (N=1,424,378)**

|                              | <b>Stroke N (%)</b><br><b>35690 (100)</b> | <b>No stroke N (%)</b><br><b>1388688 (100)</b> | <b>Unadjusted Odds Ratio</b><br><b>(95% CI) <sup>a</sup></b> | <b>Age, gender and deprivation adjusted Odds Ratio</b><br><b>(95% CI) <sup>a</sup></b> | <b>Age, gender, deprivation and morbidity count adjusted Odds Ratio</b><br><b>(95% CI) <sup>a</sup></b> |
|------------------------------|-------------------------------------------|------------------------------------------------|--------------------------------------------------------------|----------------------------------------------------------------------------------------|---------------------------------------------------------------------------------------------------------|
| <b>Number of medications</b> |                                           |                                                |                                                              |                                                                                        |                                                                                                         |
| <b>None</b>                  | 2447 (6.9%)                               | 863688 (62.2%)                                 | 1                                                            | 1                                                                                      | 1                                                                                                       |
| <b>One-two</b>               | 3038 (8.5%)                               | 240721 (17.3%)                                 | 4.45 (4.22 to 4.70)                                          | 2.38 (2.26 to 2.52)                                                                    | 2.29 (2.17 to 2.42)                                                                                     |
| <b>Three-four</b>            | 6566 (18.4%)                              | 122518 (8.8%)                                  | 18.92 (18.05 to 19.82)                                       | 6.25 (5.95 to 6.57)                                                                    | 5.78 (5.49 to 6.08)                                                                                     |
| <b>Five-six</b>              | 8185 (22.9%)                              | 75512 (5.4%)                                   | 38.26 (36.55 to 40.05)                                       | 10.50 (9.99 to 11.03)                                                                  | 9.36 (8.89 to 9.86)                                                                                     |
| <b>Seven-eight</b>           | 6721 (18.8%)                              | 43344 (3.1%)                                   | 54.73 (52.20 to 57.38)                                       | 13.90 (13.20 to 14.63)                                                                 | 11.94 (11.29 to 12.62)                                                                                  |
| <b>Nine-ten</b>              | 4219 (11.8%)                              | 22536 (1.6%)                                   | 66.08 (62.76 to 69.57)                                       | 16.22 (15.34 to 17.15)                                                                 | 13.44 (12.65 to 14.29)                                                                                  |
| <b>Eleven or more</b>        | 4514(12.6%)                               | 20369 (1.5%)                                   | 78.22 (74.32 to 82.32)                                       | 20.13 (19.05 to 21.27)                                                                 | 15.84 (14.86 to 16.88)                                                                                  |
| <sup>a</sup> all p<0.001     |                                           |                                                |                                                              |                                                                                        |                                                                                                         |

**Supplementary File 1.  
Stroke status in  
relation to  
demographic  
characteristics  
(N=1,424,378)**

|                             | <b>Stroke<br/>N (%)<br/>35690 (100)</b> | <b>No stroke<br/>N (%)<br/>1388688(100)</b> | <b>Unadjusted <u>Odds Ratio</u><br/>(95% CI)<sup>a</sup></b> | <b>Adjusted <u>Odds Ratio</u> (95% CI)<br/><sup>a,b</sup></b> |
|-----------------------------|-----------------------------------------|---------------------------------------------|--------------------------------------------------------------|---------------------------------------------------------------|
| <b>Men</b>                  | 18071 (50.6)                            | 681358 (49.1)                               | 1.07 (1.04 to 1.09) <sup>c</sup>                             | 1.49 (1.46 to 1.53) <sup>c</sup>                              |
| <b>Age group</b>            |                                         |                                             |                                                              |                                                               |
| <b>18-24</b>                | 50 (0.1)                                | 151643 (10.9)                               | 1                                                            | 1                                                             |
| <b>25-34</b>                | 157 (0.4)                               | 229239 (16.5)                               | 2.08 (1.51 to 2.86)                                          | 2.08 (1.52 to 2.86)                                           |
| <b>35-44</b>                | 592 (1.7)                               | 278401 (20.0)                               | 6.45 (4.83 to 8.61)                                          | 6.53 (4.89 to 8.71)                                           |
| <b>45-54</b>                | 2019 (5.7)                              | 251775 (18.1)                               | 24.32 (18.37 to 32.20)                                       | 24.80 (18.73 to 32.83)                                        |
| <b>55-64</b>                | 5650 (15.8)                             | 213683 (15.4)                               | 80.19 (60.70 to 105.94)                                      | 82.58 (62.51 to 109.10)                                       |
| <b>65-74</b>                | 9847 (27.6)                             | 145433 (10.5)                               | 205.35 (155.51 to 271.16)                                    | 212.61 (161.01 to 280.74)                                     |
| <b>75+</b>                  | 17375 (48.7)                            | 118514 (8.5)                                | 444.64 (336.83 to 586.95)                                    | 476.65 (361.07 to 629.23)                                     |
| <b>Deprivation quintile</b> |                                         |                                             |                                                              |                                                               |
| <b>1 affluent</b>           | 5993 (16.8)                             | 266036 (19.2)                               | 1                                                            | 1                                                             |
| <b>2</b>                    | 7724 (21.6)                             | 296430 (21.3)                               | 1.16 (1.12 to 1.20)                                          | 1.09 (1.05 to 1.12)                                           |

|                   |             |               |                     |                     |
|-------------------|-------------|---------------|---------------------|---------------------|
| <b>3</b>          | 8251 (23.1) | 313996 (22.6) | 1.17 (1.13 to 1.21) | 1.20 (1.16 to 1.24) |
| <b>4</b>          | 7008 (19.6) | 264376 (19.0) | 1.18 (1.14 to 1.22) | 1.28 (1.24 to 1.33) |
| <b>5 deprived</b> | 6714 (18.8) | 247850 (17.8) | 1.20 (1.16 to 1.25) | 1.42 (1.37 to 1.47) |

<sup>a</sup> all p values <0.001

<sup>b</sup> adjustments were made for all other demographic variables e.g. age and deprivation when examining gender.

<sup>c</sup> reference category is women

**Supplementary File 2. Stroke status and prevalence of physical morbidities (N=1,424,378)**

|                                                  | <b>Stroke N (%)</b><br><b>35690 (100)</b> | <b>No stroke N (%)</b><br><b>1388688 (100)</b> | <b>Unadjusted Odds Ratio</b><br><b>(95% CI)<sup>a,b</sup></b> | <b>Age, gender and deprivation adjusted Odds Ratio (95% CI)<sup>a,b</sup></b> |
|--------------------------------------------------|-------------------------------------------|------------------------------------------------|---------------------------------------------------------------|-------------------------------------------------------------------------------|
| <b>Epilepsy</b>                                  | 1186 (3.3)                                | 11198 (0.8)                                    | 4.23 (3.98 to 4.49)                                           | 4.43 (4.14 to 4.74)                                                           |
| <b>Hypertension</b>                              | 21742 (60.9)                              | 212572 (15.3)                                  | 8.62 (8.44 to 8.81)                                           | 2.67 (2.61 to 2.73)                                                           |
| <b>Peripheral vascular diseases</b>              | 3286 (9.2)                                | 19954 (1.4)                                    | 6.96 (6.69 to 7.23)                                           | 2.47 (2.37 to 2.58)                                                           |
| <b>Atrial fibrillation</b>                       | 4652 (13.0)                               | 19324 (1.4)                                    | 10.62 (10.27 to 10.99)                                        | 2.44 (2.36 to 2.53)                                                           |
| <b>Coronary heart disease</b>                    | 10518 (29.5)                              | 70949 (5.1)                                    | 7.76 (7.58 to 7.95)                                           | 2.06 ( 2.01 to 2.11)                                                          |
| <b>Diabetes</b>                                  | 6697 (18.8)                               | 68134 (4.9)                                    | 4.48 (4.36 to 4.60)                                           | 1.96 (1.90 to 2.02)                                                           |
| <b>Migraine</b>                                  | 273 (0.8)                                 | 8978 (0.6)                                     | 1.19 (1.05 to 1.34)                                           | 1.87 (1.65 to 2.12)                                                           |
| <b>Chronic liver disease</b>                     | 159 (0.4)                                 | 2455 (0.2)                                     | 2.53 (2.15 to 2.97)                                           | 1.86 (1.57 to 2.19)                                                           |
| <b>Chronic kidney disease</b>                    | 5100 (14.3)                               | 28466 (2.0)                                    | 7.97 (7.72 to 8.23)                                           | 1.85 (1.78 to 1.91)                                                           |
| <b>Heart failure</b>                             | 2977 (8.3)                                | 15922 (1.1)                                    | 7.85 (7.53 to 8.17)                                           | 1.82 (1.74 to 1.90)                                                           |
| <b>Constipation</b>                              | 4934 (13.8)                               | 31482 (2.3)                                    | 6.92 (6.70 to 7.14)                                           | 1.74 (1.68 to 1.80)                                                           |
| <b>Viral Hepatitis</b>                           | 19 (0.1)                                  | 1156 (0.1)                                     | 0.64 (0.41 to 1.01)<br>p=0.053                                | 1.72 (1.08 to 2.74)                                                           |
| <b>Blindness &amp; low vision</b>                | 1124 (3.1)                                | 7254 (0.5)                                     | 6.19 (5.81 to 6.60)                                           | 1.59 (1.48 to 1.70)                                                           |
| <b>Painful condition</b>                         | 7810 (21.9)                               | 118321 (8.5)                                   | 3.01 (2.93 to 3.09)                                           | 1.51 (1.47 to 1.55)                                                           |
| <b>Chronic obstructive pulmonary disease</b>     | 4235 (11.9)                               | 48872 (3.5)                                    | 3.69 (3.57 to 3.82)                                           | 1.44 (1.39 to 1.50)                                                           |
| <b>Inflammatory arthritis, connective tissue</b> | 4198 (11.8)                               | 53810 (3.9)                                    | 3.31 (3.20 to 3.42)                                           | 1.40 (1.35 to 1.45)                                                           |

|                                                              |             |             |                                |                                |
|--------------------------------------------------------------|-------------|-------------|--------------------------------|--------------------------------|
| <b>disorders and gout</b>                                    |             |             |                                |                                |
| <b>Diverticular disease of intestine</b>                     | 3472 (9.7)  | 30341 (2.2) | 4.83 (4.65 to 5.01)            | 1.35 (1.29 to 1.40)            |
| <b>Thyroid disorders</b>                                     | 4244 (11.9) | 67699 (4.9) | 2.63 (2.55 to 2.72)            | 1.34 (1.29 to 1.39)            |
| <b>Psoriasis or eczema</b>                                   | 446 (1.2)   | 9923 (0.7)  | 1.76 (1.60 to 1.93)            | 1.32 (1.19 to 1.46)            |
| <b>Parkinson's disease</b>                                   | 361 (1.0)   | 2380 (0.2)  | 5.95 (5.33 to 6.65)            | 1.30 (1.16 to 1.46)            |
| <b>Inflammatory bowel disease</b>                            | 382 (1.1)   | 9369 (0.7)  | 1.59 (1.44 to 1.77)            | 1.27 (1.14 to 1.41)            |
| <b>Irritable bowel syndrome</b>                              | 1539 (4.3)  | 50598 (3.6) | 1.19 (1.13 to 1.26)            | 1.23 (1.17 to 1.30)            |
| <b>Hearing loss</b>                                          | 3968 (11.1) | 50766 (3.7) | 3.30 (3.19 to 3.41)            | 1.17 (1.13 to 1.22)            |
| <b>Multiple sclerosis</b>                                    | 92 (0.3)    | 3755 (0.3)  | 0.95 (0.78 to 1.17)<br>p=0.650 | 1.12 (0.90 to 1.38)<br>p=0.309 |
| <b>Prostate disorders</b>                                    | 1424 (4.0)  | 13809 (1.0) | 4.14 (3.91 to 4.37)            | 1.11 (1.05 to 1.18)            |
| <b>Asthma</b>                                                | 2285 (6.4)  | 82220 (5.9) | 1.09 (1.04 to 1.14)            | 1.10 (1.05 to 1.15)            |
| <b>Glaucoma</b>                                              | 1544 (4.3)  | 14375 (1.0) | 4.32 (4.10 to 4.56)            | 1.08 (1.02 to 1.14)            |
| <b>Cancer</b>                                                | 2937 (8.2)  | 40727 (2.9) | 2.97 (2.85 to 3.09)            | 1.08 (1.04 to 1.13)            |
| <b>Bronchiectasis</b>                                        | 173 (0.5)   | 2641 (0.2)  | 2.56 (2.19 to 2.98)            | 1.06 (0.91 to 1.25)<br>p=0.454 |
| <b>Chronic sinusitis</b>                                     | 248 (0.7)   | 8917 (0.6)  | 1.08 (0.95 to 1.23)<br>p=0.219 | 1.02 (0.89 to 1.16)<br>p=0.820 |
| <b>Dyspepsia</b>                                             | 2571 (7.2)  | 76633 (5.5) | 1.33 (1.28 to 1.38)            | 0.63 (0.60 to 0.66)            |
| <sup>a</sup> reference category is absence of each condition |             |             |                                |                                |
| <sup>b</sup> all p values <0.001 unless otherwise stated     |             |             |                                |                                |



**Supplementary File 3. Stroke status and prevalence of mental health morbidities (N=1,424,378)**

|                                                              | <b>Stroke N (%)<br/>35690 (100)</b> | <b>Non stroke N (%)<br/>1388688 (100)</b> | <b>Unadjusted Odds Ratio<br/>(95% CI)<sup>a,b</sup></b> | <b>Age, gender and<br/>deprivation adjusted<br/>Odds Ratio (95% CI)<sup>a,b</sup></b> |
|--------------------------------------------------------------|-------------------------------------|-------------------------------------------|---------------------------------------------------------|---------------------------------------------------------------------------------------|
| <b>Drug and medication use problems</b>                      | 3831 (10.7)                         | 38629 (2.8)                               | 4.20 (4.06 to 4.35)                                     | 2.34 (2.25 to 2.43)                                                                   |
| <b>Depression</b>                                            | 7394 (20.7)                         | 136549 (9.8)                              | 2.40 (2.33 to 2.46)                                     | 2.09 (2.03 to 2.15)                                                                   |
| <b>Alcohol problems</b>                                      | 2062 (5.8)                          | 40301 (2.9)                               | 2.05 (1.96 to 2.15)                                     | 2.05 (1.96 to 2.15)                                                                   |
| <b>Anxiety &amp; stress</b>                                  | 4026 (11.3)                         | 51700 (3.7)                               | 3.29 (3.18 to 3.40)                                     | 1.61 (1.55 to 1.66)                                                                   |
| <b>Learning disability</b>                                   | 115 (0.3)                           | 4899 (0.4)                                | 0.91 (0.76 to 1.10)<br>p=0.336                          | 1.50 (1.24 to 1.82)                                                                   |
| <b>Anorexia or bulimia</b>                                   | 118 (0.3)                           | 5188 (0.4)                                | 0.89 (0.74 to 1.06)<br>p=0.189                          | 1.50 (1.24 to 1.83)                                                                   |
| <b>Dementia</b>                                              | 2075 (5.8)                          | 9621 (0.7)                                | 8.85 (8.43 to 9.29)                                     | 1.44 (1.37 to 1.52)                                                                   |
| <b>Schizophrenia and bipolar disorder</b>                    | 452 (1.3)                           | 12041 (0.9)                               | 1.47 (1.33 to 1.61)                                     | 1.32 (1.20 to 1.46)                                                                   |
| <sup>a</sup> reference category is absence of each condition |                                     |                                           |                                                         |                                                                                       |
| <sup>b</sup> all p values <0.001 unless otherwise stated     |                                     |                                           |                                                         |                                                                                       |

Supplementary file 4 Stroke status and number of morbidities and repeat medications for two age groups

|                                                                  | Stroke N (%)<br>35690 (100) | No stroke (%)<br>1388688 (100) | Gender and deprivation adjusted<br><b>Odds Ratio</b> (95% CI) <sup>a</sup> |
|------------------------------------------------------------------|-----------------------------|--------------------------------|----------------------------------------------------------------------------|
| <b>Total number of morbidities<sup>b</sup> (Age group 35-44)</b> |                             |                                |                                                                            |
| None                                                             | 162 (27.4)                  | 179346 (64.4)                  | 1                                                                          |
| One-three                                                        | 332 (56.1)                  | 92652 (33.3)                   | 3.93 (3.25 to 4.75)                                                        |
| Four-six                                                         | 84 (14.2)                   | 6069 (2.2)                     | 14.77 (11.29 to 19.32)                                                     |
| Seven or more                                                    | 14 (2.4)                    | 334 (0.1)                      | 45.19 (25.83 to 79.04)                                                     |
| <b>Number of morbidities<sup>b</sup> (Age group 75plus)</b>      |                             |                                |                                                                            |
| None                                                             | 435 (2.5)                   | 11846 (10.0)                   | 1                                                                          |
| One-three                                                        | 7620 (43.9)                 | 64934 (54.8)                   | 3.23 (2.92 to 3.56)                                                        |
| Four-six                                                         | 7009 (40.3)                 | 34197 (28.9)                   | 5.69 (5.15 to 6.28)                                                        |
| Seven or more                                                    | 2311 (13.3)                 | 7537 (6.4)                     | 8.56 (7.70 to 9.53)                                                        |
| <b>Number of medications (Age 35-74)</b>                         |                             |                                |                                                                            |
| None                                                             | 180 (30.4)                  | 217,943 (78.3)                 | 1                                                                          |
| One-two                                                          | 135 (22.8)                  | 42,772 (15.4)                  | 3.86 (3.06 to 4.83)                                                        |
| Three-four                                                       | 99 (16.7)                   | 10,688 (3.8)                   | 11.12 (8.68 to 14.25)                                                      |
| Five-six                                                         | 65 (11.0)                   | 3,912 (1.4)                    | 19.83 (14.89 to 26.42)                                                     |
| Seven-eight                                                      | 46 (7.8)                    | 1,713 (0.6)                    | 32.10 (23.10 to 44.60)                                                     |
| Nine-ten                                                         | 37 (6.3)                    | 735 (0.3)                      | 59.91 (41.66 to 86.16)                                                     |
| Eleven or more                                                   | 30 (5.1)                    | 638 (0.2)                      | 56.14 (37.77 to 83.43)                                                     |
| <b>Number of medications (Age 75 plus)</b>                       |                             |                                |                                                                            |
| None                                                             | 970 (5.6)                   | 16,153 (13.6)                  | 1                                                                          |
| One-two                                                          | 1,017 (5.9)                 | 20,805 (17.6)                  | 0.82 (0.75 to 0.90)                                                        |

|                |              |               |                     |
|----------------|--------------|---------------|---------------------|
| Three-four     | 2,897 (16.7) | 26,558 (22.4) | 1.85 (1.72 to 2.00) |
| Five-six       | 4,147 (23.9) | 23,290 (19.7) | 3.04 (2.83 to 3.27) |
| Seven-eight    | 3,690 (21.2) | 15,616 (13.2) | 4.05 (3.76 to 4.36) |
| Nine-ten       | 2,376 (13.7) | 8,760 (7.4)   | 4.68 (4.32 to 5.07) |
| Eleven or more | 2,278 (13.1) | 7,332 (6.2)   | 5.38 (4.97 to 5.83) |

all p values <0.001

[Supplementary file 5](#)

**Definitions of 31 physical health conditions assessed.**

| <b><u>Condition</u></b>                                                    | <b><u>Variable Definition</u></b>                                                      |
|----------------------------------------------------------------------------|----------------------------------------------------------------------------------------|
| <a href="#">Coronary heart disease</a>                                     | <a href="#">Read code ever recorded</a>                                                |
| <a href="#">Chronic kidney disease</a>                                     | <a href="#">Read code ever recorded</a>                                                |
| <a href="#">Asthma (active)</a>                                            | <a href="#">Read code ever recorded AND any prescription in last year</a>              |
| <a href="#">Atrial fibrillation</a>                                        | <a href="#">Read code ever recorded</a>                                                |
| <a href="#">Epilepsy</a>                                                   | <a href="#">Read code ever recorded AND epilepsy prescription in last year</a>         |
| <a href="#">New cancer in the last 5 years</a>                             | <a href="#">Read code first recorded in last 5 years (Relevant Read Code recorded)</a> |
| <a href="#">Thyrotoxicosis/Thyroid disorders (includes hypothyroidism)</a> | <a href="#">Read code ever recorded (Relevant Read Code recorded)</a>                  |
| <a href="#">Diabetes</a>                                                   | <a href="#">Read code ever recorded</a>                                                |
| <a href="#">Parkinson's disease</a>                                        | <a href="#">Read code ever recorded (Relevant Read Code recorded)</a>                  |

Formatted Table

|                                                                                                                         |                                                                                                                                                  |
|-------------------------------------------------------------------------------------------------------------------------|--------------------------------------------------------------------------------------------------------------------------------------------------|
| <a href="#">Multiple sclerosis</a>                                                                                      | <a href="#">Read code ever recorded (Relevant Read Code recorded)</a>                                                                            |
| <a href="#">Visual impairment</a>                                                                                       | <a href="#">Read code ever recorded (Relevant Read Code recorded)</a>                                                                            |
| <a href="#">Glaucoma</a>                                                                                                | <a href="#">Read code ever recorded (Relevant Read Code recorded)</a>                                                                            |
| <a href="#">Hearing loss</a>                                                                                            | <a href="#">Read code ever recorded (Relevant Read Code recorded)</a>                                                                            |
| <a href="#">Hypertension</a>                                                                                            | <a href="#">Read code ever recorded (Relevant Read Code recorded)</a>                                                                            |
| <a href="#">Heart failure</a>                                                                                           | <a href="#">Read code ever recorded</a>                                                                                                          |
| <a href="#">Peripheral vascular diseases</a>                                                                            | <a href="#">Read code ever recorded (Relevant Read Code recorded)</a>                                                                            |
| <a href="#">Chronic sinusitis</a>                                                                                       | <a href="#">Read code ever recorded (Relevant Read Code recorded)</a>                                                                            |
| <a href="#">Bronchitis, emphysema &amp; other chronic obstructive pulmonary diseases</a>                                | <a href="#">Read code ever recorded (Relevant Read Code recorded)</a>                                                                            |
| <a href="#">Bronchiectasis</a>                                                                                          | <a href="#">Read code ever recorded (Relevant Read Code recorded)</a>                                                                            |
| <a href="#">Crohn's disease &amp; ulcerative colitis</a>                                                                | <a href="#">Read code ever recorded (Relevant Read Code recorded)</a>                                                                            |
| <a href="#">Diverticular disease of intestine</a>                                                                       | <a href="#">Read code ever recorded (Relevant Read Code recorded)</a>                                                                            |
| <a href="#">Rheumatoid arthritis, other inflammatory polyarthropathies &amp; systematic connective tissue disorders</a> | <a href="#">Read code ever recorded (Relevant Read Code recorded)</a>                                                                            |
| <a href="#">Hyperplasia of prostate &amp; prostate disorders</a>                                                        | <a href="#">Read code ever recorded (Relevant Read Code recorded)</a>                                                                            |
| <a href="#">Psoriasis or eczema</a>                                                                                     | <a href="#">Read code ever recorded (M11% &amp; M12%) AND ≥ 4 prescription in last year (BNF 13.4, excluding hydrocortisone, &amp; BNF 13.5)</a> |

|                                                                |                                                                                                                                                                                                                                                                             |
|----------------------------------------------------------------|-----------------------------------------------------------------------------------------------------------------------------------------------------------------------------------------------------------------------------------------------------------------------------|
| <u>Viral Hepatitis</u>                                         | <u>Read code ever recorded (Relevant Read Code recorded)</u>                                                                                                                                                                                                                |
| <u>Irritable bowel syndrome</u>                                | <u>Read code ever recorded (Relevant Read Code recorded) OR <math>\geq 4</math> antispasmodic prescription in last year (POM only, exclude kolanticon, alverine citrate &amp; peppermint oil)</u>                                                                           |
| <u>Cirrhosis/chronic liver disease/alcoholic liver disease</u> | <u>Read code ever recorded (Relevant Read Code recorded)</u>                                                                                                                                                                                                                |
| <u>Migraine</u>                                                | <u><math>\geq 4</math> anti-migraine prescriptions in last year (BNF 040704%, POM only exclude migravele)</u>                                                                                                                                                               |
| <u>Dyspepsia</u>                                               | <u><math>\geq 4</math> prescriptions in last year BNF 0103% excluding antacids AND NOT <math>\geq 4</math> NSAIDS OR <math>\geq 4</math> aspirin/clopidogrel</u>                                                                                                            |
| <u>Constipation</u>                                            | <u><math>\geq 4</math> prescriptions in last year, BNF 0106%</u>                                                                                                                                                                                                            |
| <u>Pain</u>                                                    | <u><math>\geq 4</math> specified analgesic prescriptions in last year (opioids/<math>&gt;8</math>mg co-codamol/NSAIDS) OR <math>\geq 4</math> specified anti-epileptics in the absence of an epilepsy Read code in last year (gabapentin, pregabalin and carbamazepine)</u> |

Definitions of 8 mental health conditions assessed

| <u>Condition</u>                                                               | <u>Variable Definition</u>                                                                                                                                                                                             |
|--------------------------------------------------------------------------------|------------------------------------------------------------------------------------------------------------------------------------------------------------------------------------------------------------------------|
| <u>Anorexia or bulimia</u>                                                     | <u>Read code ever recorded</u>                                                                                                                                                                                         |
| <u>Drugs misuse (Other psychoactive substance misuse)</u>                      | <u>Read code ever recorded</u>                                                                                                                                                                                         |
| <u>Anxiety &amp; other neurotic, stress related &amp; somatoform disorders</u> | <u>Read code in last 12 months OR <math>\geq</math> 4 anxiolytic/hypnotic prescriptions in last 12 months OR <math>\geq</math> 4 10/25mg amitriptyline in last 12 months &amp; do not meet the criteria for 'Pain'</u> |
| <u>Depression</u>                                                              | <u>Read code recorded in last 12 months OR <math>\geq</math>4 anti-depressant prescriptions (excluding low dose tricyclics) in last 12 months</u>                                                                      |
| <u>Alcohol misuse</u>                                                          | <u>Read code ever recorded</u>                                                                                                                                                                                         |
| <u>Schizophrenia (and related non-organic psychosis) or bipolar disorder</u>   | <u>Read code ever recorded/recorded in last 12 months (code dependent) OR Lithium prescribed in last 168 days</u>                                                                                                      |
| <u>Dementia</u>                                                                | <u>Read code ever recorded</u>                                                                                                                                                                                         |
| <u>Learning disability</u>                                                     | <u>Read code ever recorded</u>                                                                                                                                                                                         |

Formatted Table
